# Supplementary material for: Quantum spin hall insulators in strain-modified arsenene
Source: Royal Society of Chemistry journal article supplement (doi:10.1039/c5nr05006e), 2015-01-01
Supplement: c5nr05006e1.pdf [file c5nr05006e1.pdf]

## Supporting Information

### Quantum Spin Hall Insulators in Strain-modified Arsenene

Haijun Zhang,<sup>†</sup> Yandong Ma,<sup>‡</sup> Zhongfang Chen<sup>†,\*</sup>

Department of Chemistry, Institute for Functional Nanomaterials, University of Puerto Rico, Rio Piedras Campus, San Juan, PR 00931, Department of Physics and Earth Science, Jacobs University Bremen, Campus Ring 1, 28759 Bremen, Germany

<sup>†</sup> University of Puerto Rico

<sup>‡</sup> Jacobs University Bremen

To whom correspondence should be addressed. Email: [zhongfangchen@gmail.com](mailto:zhongfangchen@gmail.com) (ZC)

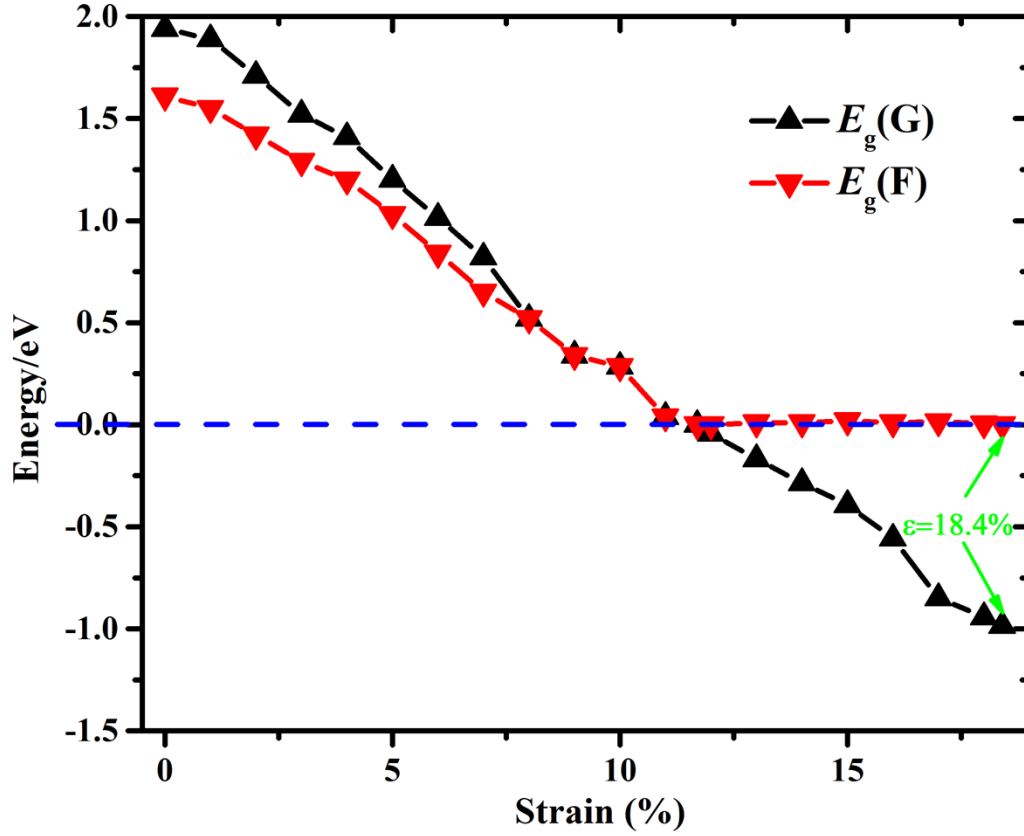

**Figure S1** Strain dependent of functional energy gaps  $E_g$  (F) and band gaps at G point  $E_g$  (G).

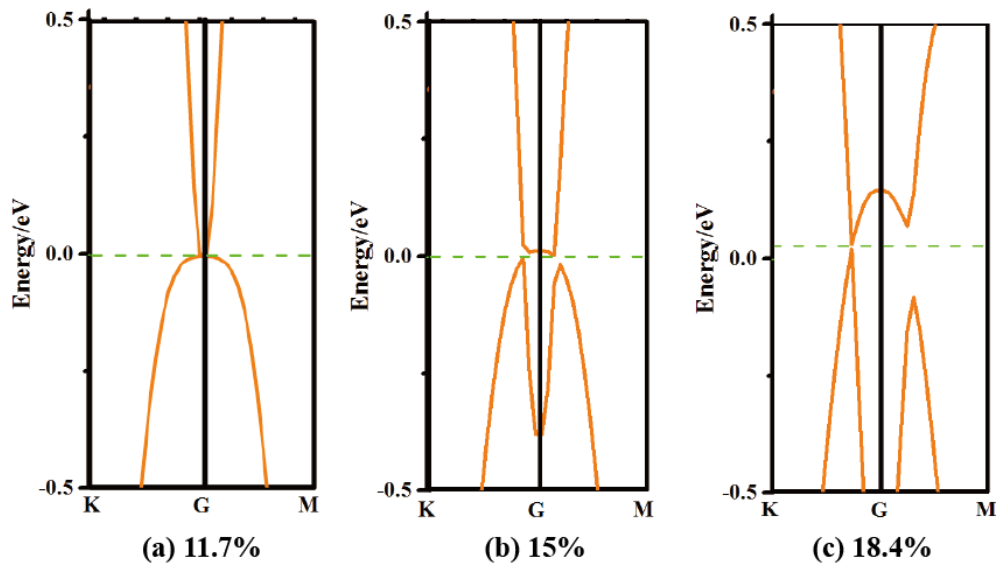

**Figure S2** Enlarged band structures around Fermi level for arsenene with different strain. Green dashed lines represents Fermi level at 0 eV.

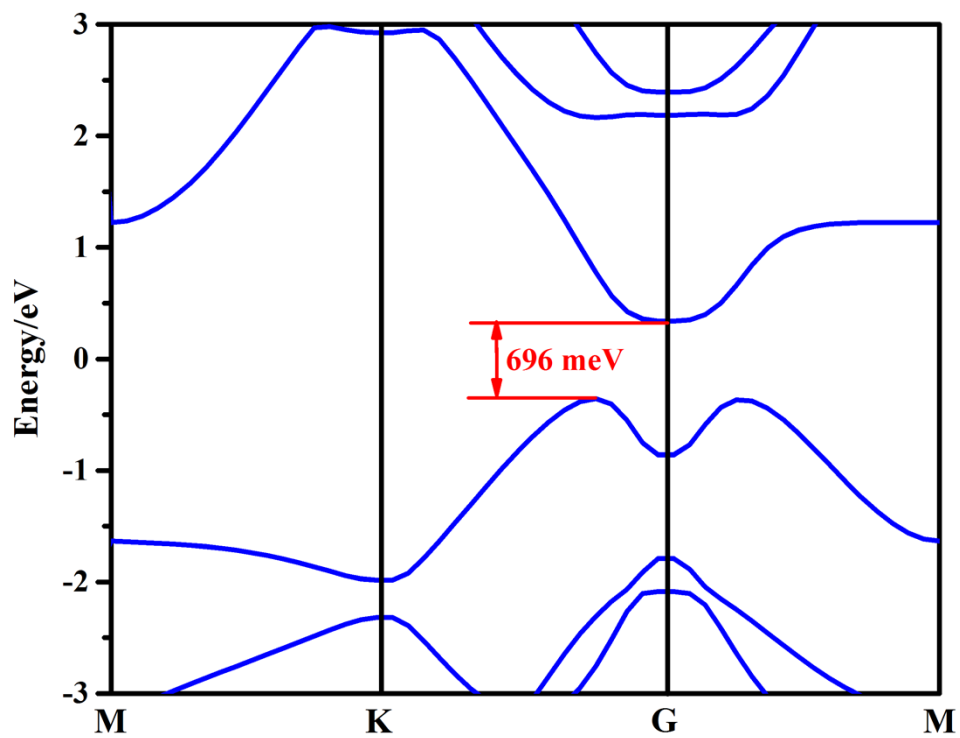

**Figure S3** Band structure of arsenene under strain of 18.4%, calculated by HSE06 method with SOC effect.
